# Supplementary material for: Global Gene Expression Characterization of Circulating Tumor Cells in Metastasic Castration-Resistant Prostate Cancer Patients
Source: MDPI journal article supplement (doi:10.3390/jcm9072066), 2020-07-01
Supplement: s1 [file s1]

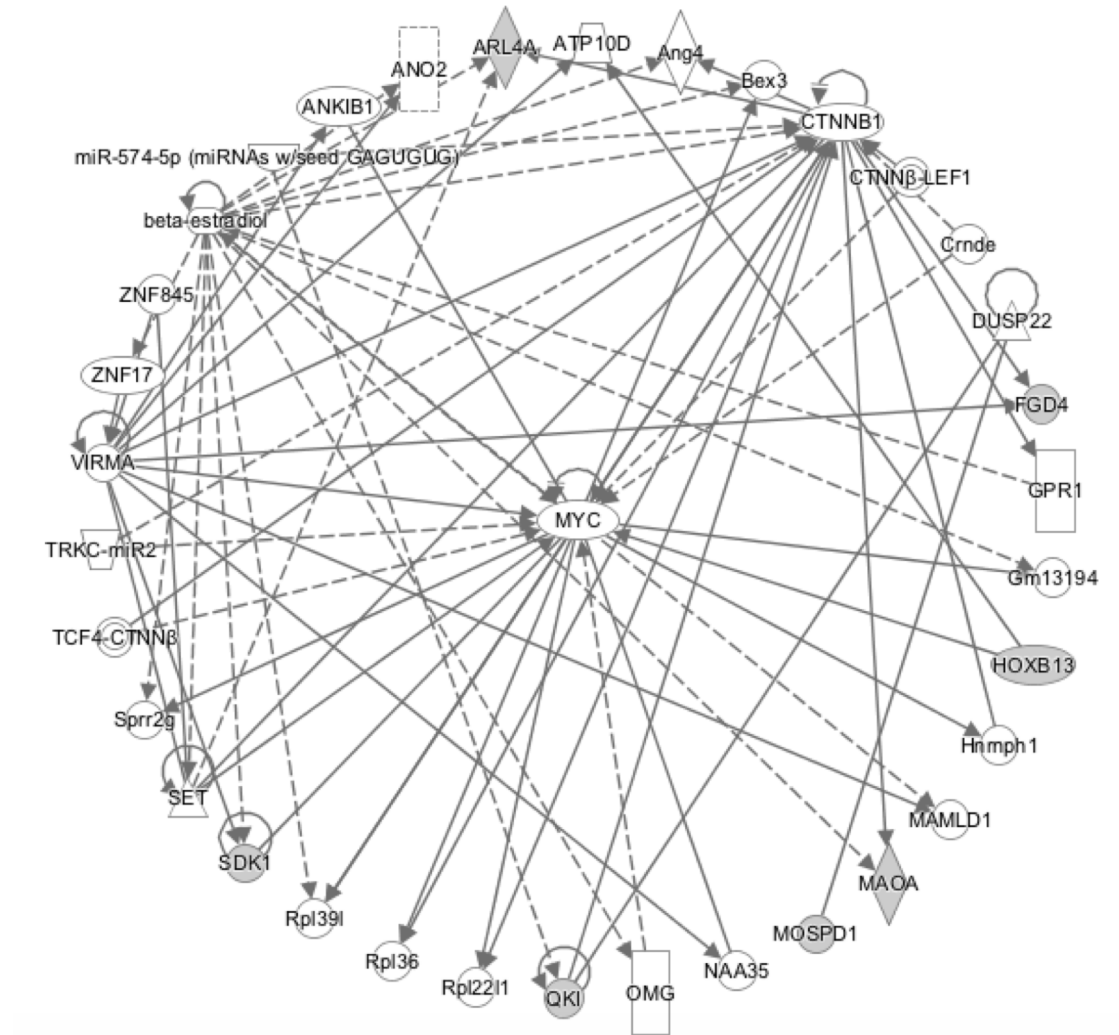

Supplementary Figure 1. Main molecular network linked to the CTC panel analyzed by RT-qPCR. Main regulation of these gene is centralized on MYC activity.
